# Supplementary material for: Investigating the dissolution of the metastable triclinic polymorph of carbamazepine using in situ microscopy
Source: Royal Society of Chemistry journal article supplement (doi:10.1039/c4ce00062e), 2014-01-01
Supplement: c4ce00062e1.pdf [file c4ce00062e1.pdf]

## Electronic Supplementary Information(ESI)

### Investigating the Dissolution of the Metastable Triclinic Polymorph of Carbamazepine using *in situ* Microscopy

Marcus O'Mahony,<sup>\*a, b</sup> Colin C. Seaton,<sup>a</sup> Denise M. Croker,<sup>a</sup> Stephane Veessler,<sup>c</sup> Åke C. Rasmuson<sup>a</sup> and Benjamin K. Hodnett<sup>a</sup>

<sup>a</sup> Synthesis and Solid State Pharmaceutical Centre, Materials and Surface Science Institute, Department of Chemical and Environmental Sciences, University of Limerick, Limerick, Ireland. Fax: +353 61 213529; Tel: +353 61 233754; E-mail: [colin.seaton@ul.ie](mailto:colin.seaton@ul.ie), [ake.rasmuson@ul.ie](mailto:ake.rasmuson@ul.ie), [kieran.hodnett@ul.ie](mailto:kieran.hodnett@ul.ie).

<sup>b</sup> MIT-Novartis Center for Continuous Manufacture, Department of Chemical Engineering, Massachusetts Institute of Technology, 77 Massachusetts Ave, Cambridge, MA 02138. Tel: +1 617 324 4525; E-mail: [\\*omahonym@mit.edu](mailto:*omahonym@mit.edu).

<sup>c</sup> CINaM-CNRS, Campus de Luminy, Case 913, 13288 Marseille Cedex, France. Tel: +33(0)4 91 17 28 00; E-mail: [veessler@cinam.univ-mrs.fr](mailto:veessler@cinam.univ-mrs.fr)

#### Electronic Supplementary Information

Shown below in Fig. S1 to S3 is the sublimation of FI at 165 °C. The sublimation rate is in addition to examples showing the dissolution of FI in acetonitrile and methanol (20 °C,  $\sigma_u = 0.18$ ), also with dissolution rates measured.

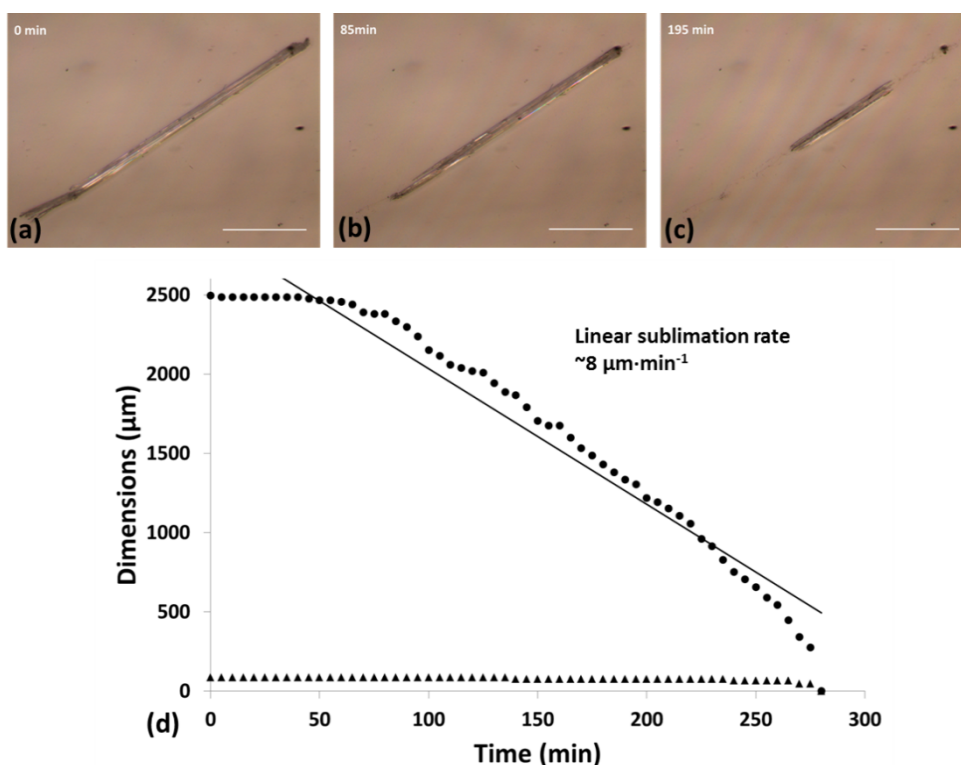

**Fig. S1** *In situ* microscopy for the sublimation of FI. (a)-(c) Time lapsed images under the hot stage microscope showing the FI crystal subliming at 165 °C. Inset: time of image and scale bar of 500 µm. (d) Sublimation measurements of the width ▲ and length ● of the subliming FI crystal from over time at 165 °C.

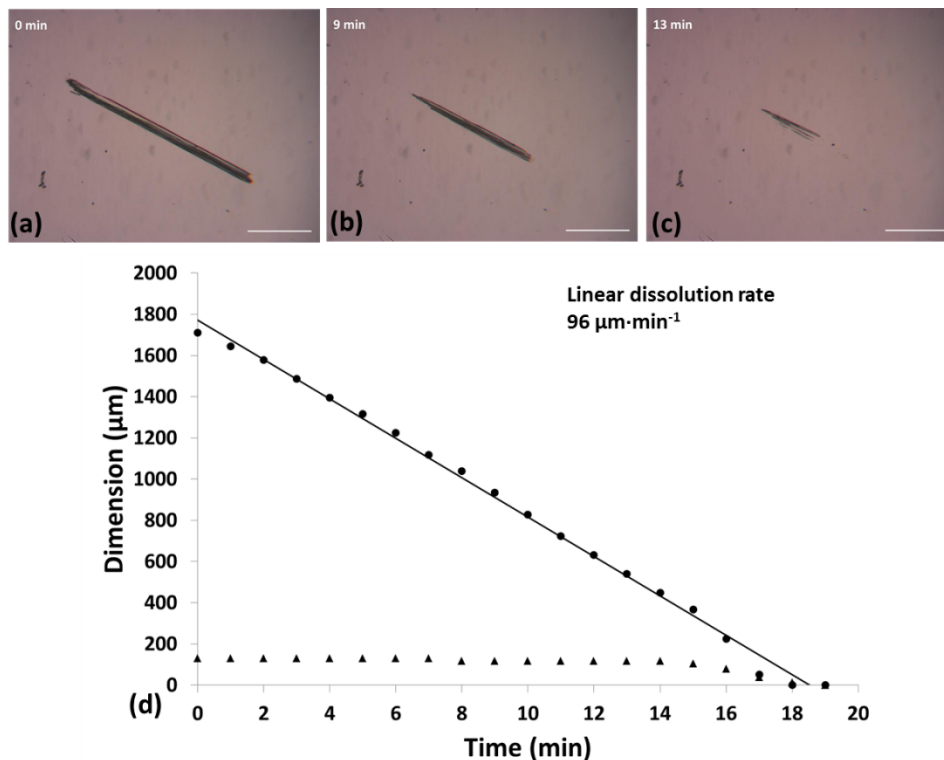

**Fig. S2.** *In situ* microscopy for the dissolution of FI in **acetonitrile**. (a)-(c) Time lapsed images showing the dissolution of FI in acetonitrile at 20 °C with  $\sigma_u = 0.18$  (solution concentration 0.0512 g CBZ / g MeCN). Inset: time of image and scale bar of 500  $\mu\text{m}$ . (d) dissolution measurement of the width  $\blacktriangle$  and length  $\bullet$  of the dissolving FI crystal in acetonitrile over time. A reduced number of data points were collected due to the rate at which the dissolution proceeds.

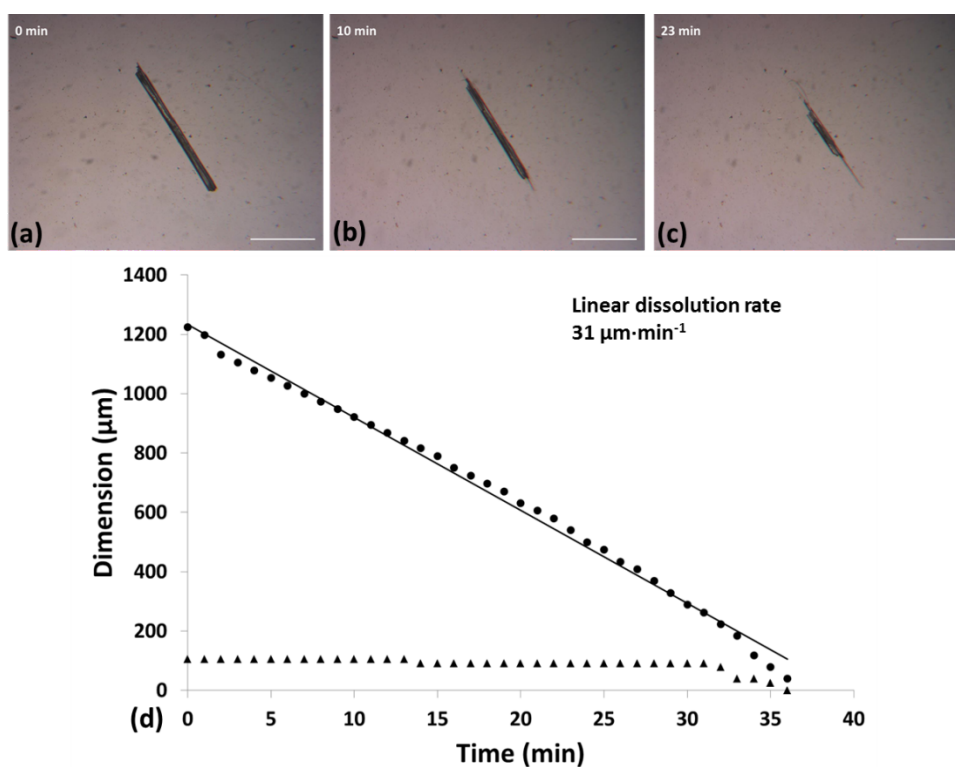

**Fig. S2.** *In situ* microscopy for the dissolution of FI in **methanol**. (a)-(c) Time lapsed images showing the dissolution of FI in methanol at 20 °C with  $\sigma_u = 0.18$  (solution concentration 0.0964 g CBZ / g MeOH). Inset in each image: time of image and scale bar of 500  $\mu\text{m}$ . (d) dissolution measurement of the width  $\blacktriangle$  and length  $\bullet$  of the dissolving FI crystal in methanol over time.

The following videos files are also available as part of the ESI:

- Sublimation of FI at 165 °C – Fig. S1
- Sublimation of FI at 145 °C – Fig. 3e-h
- Dissolution of FI in ethanol at 20°C with  $\sigma_u = 0.18$  – Fig. 3a-d
- Dissolution of FI in acetonitrile at 20°C with  $\sigma_u = 0.18$  – Fig. S2
- Dissolution of FI in methanol at 20°C with  $\sigma_u = 0.18$  – Fig. S3
- Dissolution of FI in ethanol at 20°C with  $\sigma_u = 0.045$  – Fig.5a-c
- Dissolution of FI in ethanol at 20°C with  $\sigma_u = 0.045$  – Fig.5d-f
- Dissolution of FI in ethanol at 30°C with  $\sigma_u = 0.023$  – Fig.5g-i
